# Supplementary material
Source: HighWire-hosted journal article supplement (https://ijgc.bmj.com/highwire/filestream/33332/field_highwire_adjunct_files/0/ijgc-2023-004484supp001_data_supplement.pdf)

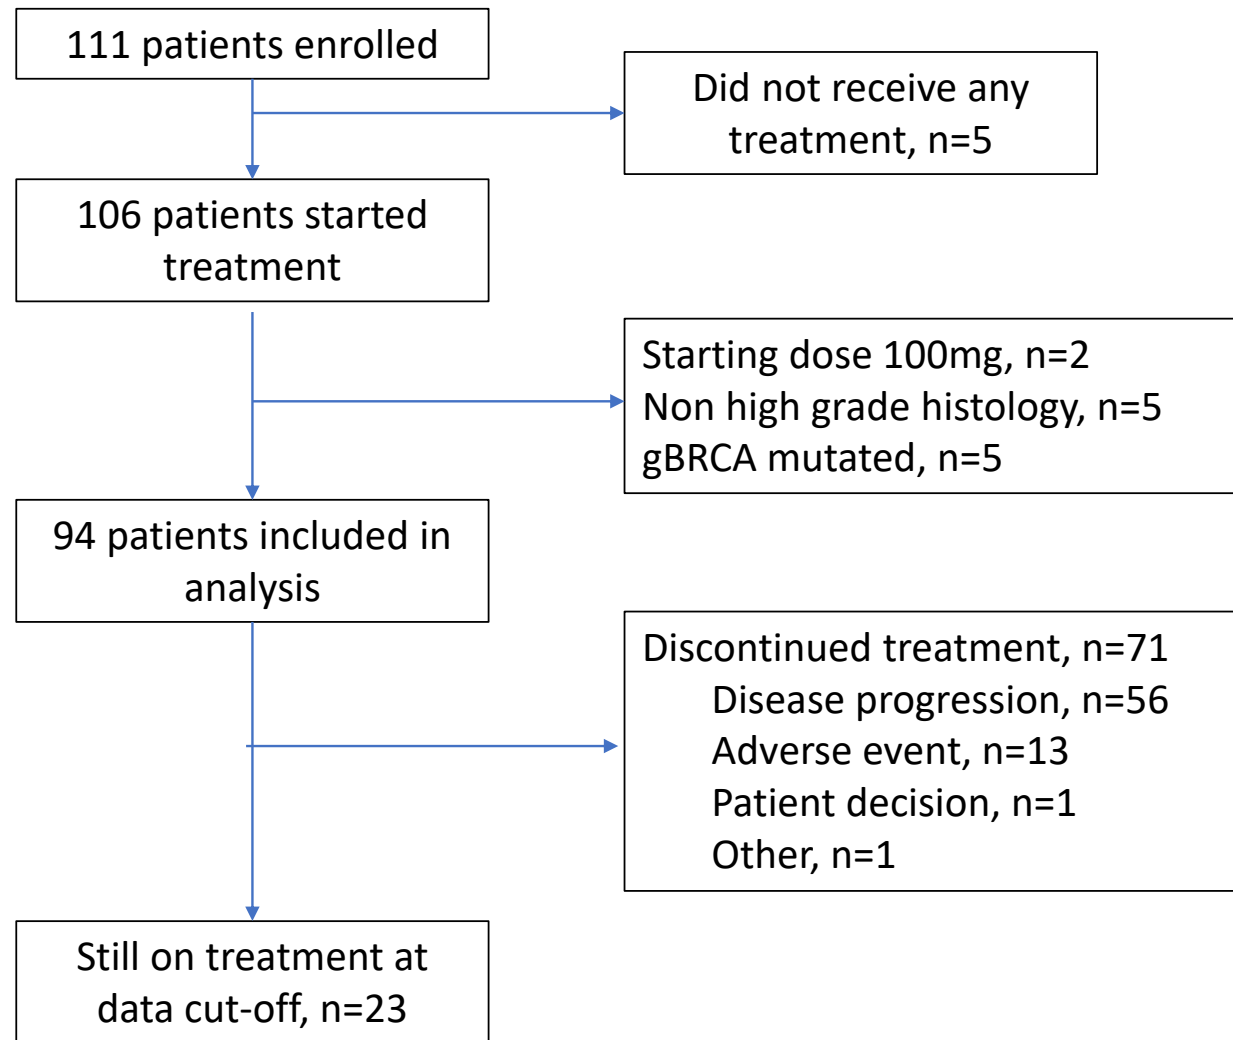

Supplement: ijgc-2023-004484supp001_data_supplement.pdf [file ijgc-2023-004484supp001_data_supplement.pdf]
